# Supplementary material for: Antibody-functionalized theranostic protein nanoparticles for the synergistic deep red fluorescence imaging and multimodal therapy of ovarian cancer
Source: Royal Society of Chemistry journal article supplement (doi:10.1039/d1bm01002f), 2021-01-01
Supplement: d1bm01002f1.pdf [file d1bm01002f1.pdf]

## Supplementary Information

### Antibody Functionalized Theranostic Protein Nanoparticles for Synergistic Deep Red Fluorescence Imaging and Multimodal Therapy of Ovarian Cancer

Raluca Borlan<sup>1,2</sup>, Monica Focsan<sup>2</sup>✉, Maria Perde-Schrepler<sup>3</sup>, Olga Soritau<sup>3</sup>, Andreea Campu<sup>2</sup>, Luiza Gaina<sup>4</sup>, Eموke Pall<sup>5</sup>, Bogdan Pop<sup>6,7</sup>, Oana Baldasici<sup>8</sup>, Claudia Gherman<sup>9</sup>, Daria Stoia<sup>2</sup>, Dana Maniu<sup>1,2</sup>, Simion Astilean<sup>1,2</sup>✉

<sup>1</sup> Biomolecular Physics Department, Faculty of Physics, Babes-Bolyai University, Cluj-Napoca, Cluj, Romania;

<sup>2</sup> Nanobiophotonics and Laser Microspectroscopy Centre, Interdisciplinary Research Institute on Bio-Nano-Sciences, Babes-Bolyai University, Cluj-Napoca, Cluj, Romania;

<sup>3</sup> Department of Radiobiology and Tumor Biology, Oncology Institute Prof. Dr. Ion Chiricuta, Cluj-Napoca, Cluj, Romania;

<sup>4</sup> The Research Centre on Fundamental and Applied Heterochemistry, Department of Chemistry, Faculty of Chemistry and Chemical Engineering, Babes-Bolyai University, Cluj-Napoca, Cluj, Romania;

<sup>5</sup> Department of Infectious Diseases, University of Agricultural Sciences and Veterinary Medicine, Cluj-Napoca, Cluj, Romania;

<sup>6</sup> Department of Pathology, Oncology Institute Prof. Dr. Ion Chiricuta, Cluj-Napoca, Cluj, Romania;

<sup>7</sup> Department of Pathology, University of Medicine and Pharmacy Iuliu Hațieganu, Cluj-Napoca, Cluj, Romania;

<sup>8</sup> Department of Functional Genomics, Proteomics and Experimental Pathology, Oncology Institute Prof. Dr. Ion Chiricuta, Cluj-Napoca, Cluj, Romania;

<sup>9</sup> Department of Functional Genomics, Proteomics and Experimental Pathology, Oncology Institute Prof. Dr. Ion Chiricuta, Cluj-Napoca, Cluj, Romania;

✉ Corresponding authors

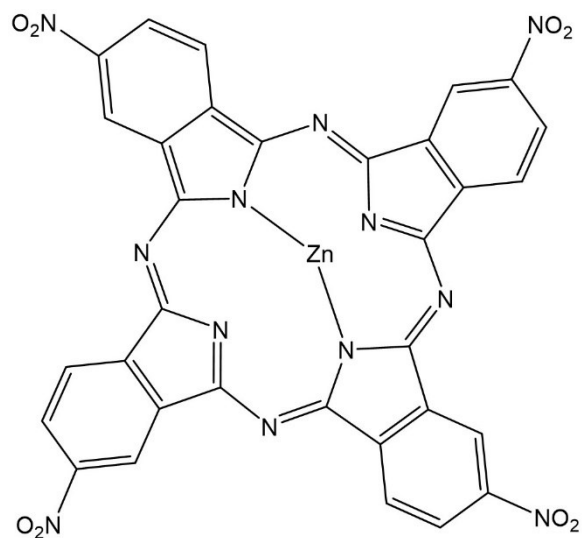

**Figure S1.** Chemical structure of Zn (II)-2,9,16,23-tetranitrophthalocyanine (phthalONO<sub>2</sub>) fluorophore (empirical formula C<sub>32</sub>H<sub>12</sub>N<sub>12</sub>O<sub>8</sub>Zn).

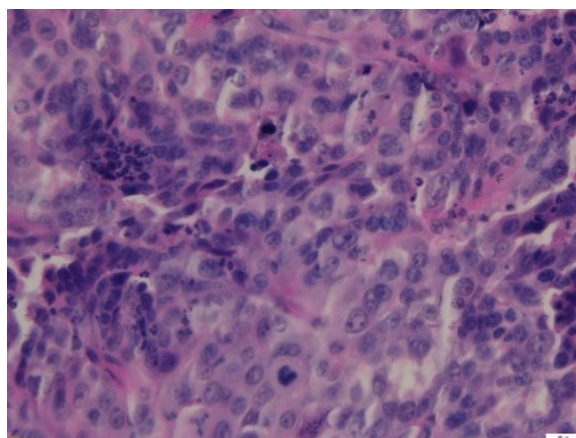

**Figure S2.** H&E staining of induced NIH:OVCAR3 tumor xenograft in athymic mice BALB/c (note the tumor cells with prominent nucleoli and mitotic figures).

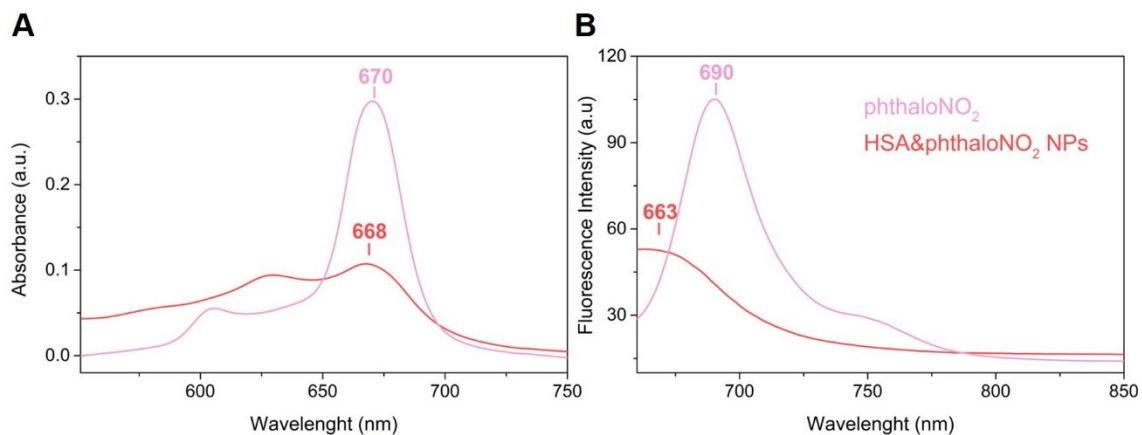

**Figure S3.** (A) Absorbance and (B) fluorescence emission spectra of phthalonitrile@DMSO solution (pink) and HSA&phthalonitrile NPs@PBS (orange).

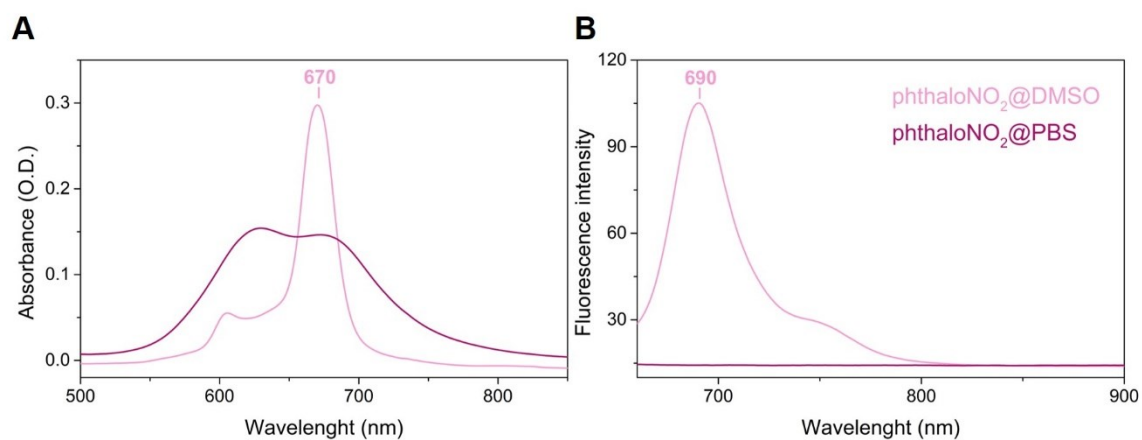

**Figure S4.** (A) Absorbance and (B) fluorescence emission spectra of phthalonitrile@DMSO (pink) and phthalonitrile@PBS (purple).

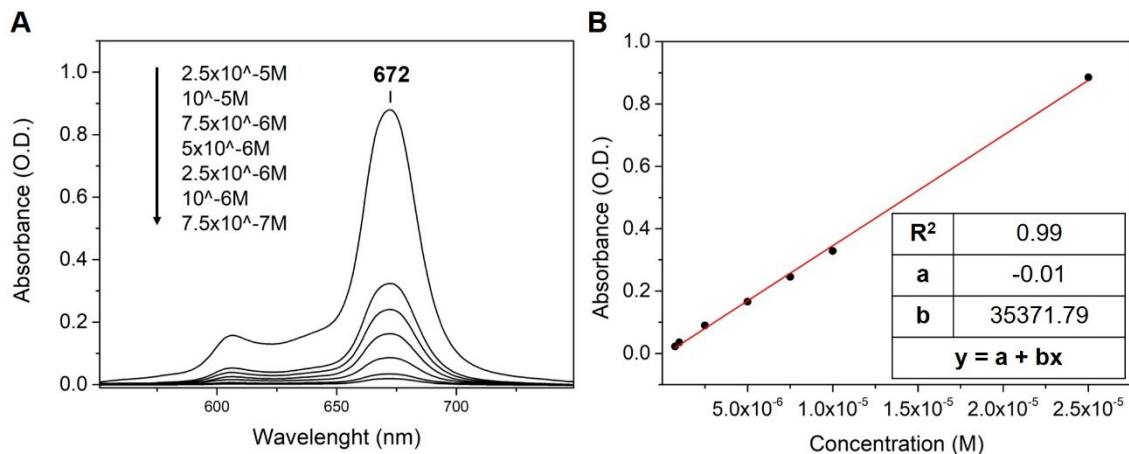

**Figure S5.** (A) Absorbance spectra and (B) calibration curve for various concentrations of phthaloNO<sub>2</sub> solution.

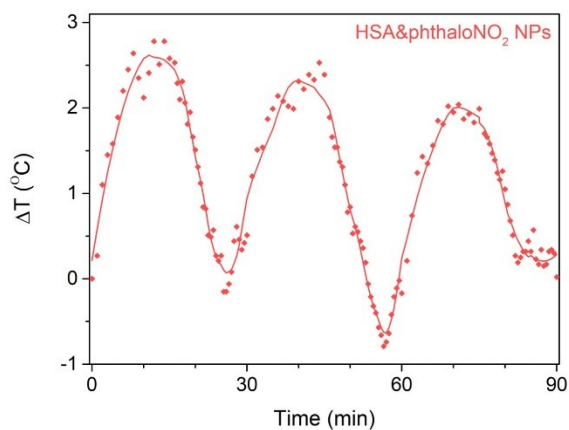

**Figure S6.** Thermal curves in time of HSA&phthaloNO<sub>2</sub> NPs during 3 heating/cooling cycles, under irradiation with a 660 nm LED lamp.

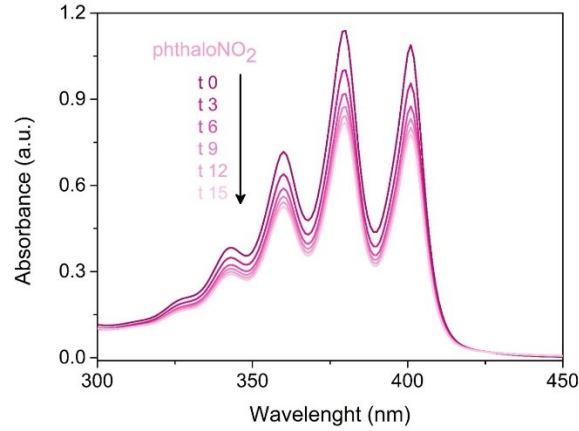

**Figure S7.** Absorbance spectra of ABDA molecule at different time points (0, 3, 6, 9, 12, 15 min) while under a 660 nm LED lamp exposure in the presence of phthalonitrile solution.

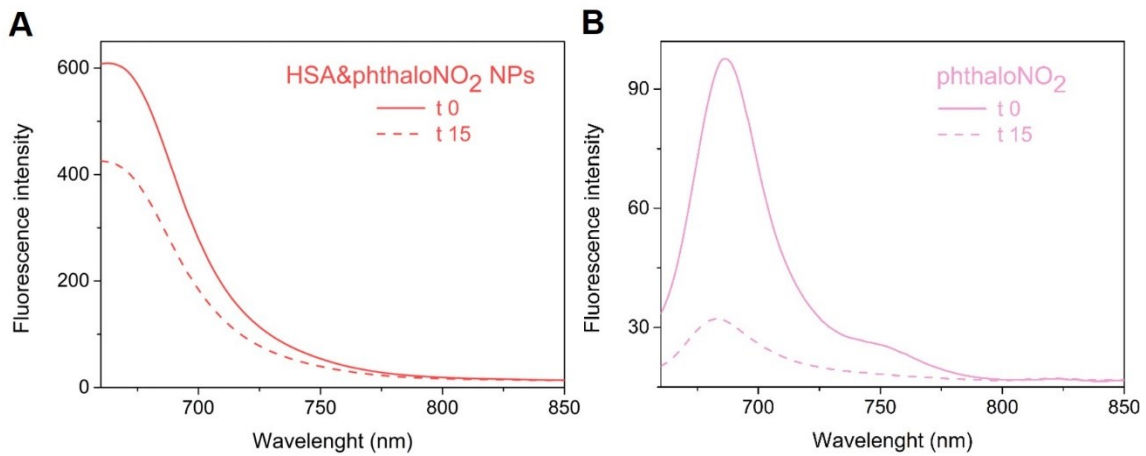

**Figure S8.** Fluorescence emission spectra of (A) HSA&phthalonitrile NPs and (B) phthalonitrile solution, at the initial time (solid line) and after 15 min of irradiation (dashed line) with a 660 nm LED lamp.

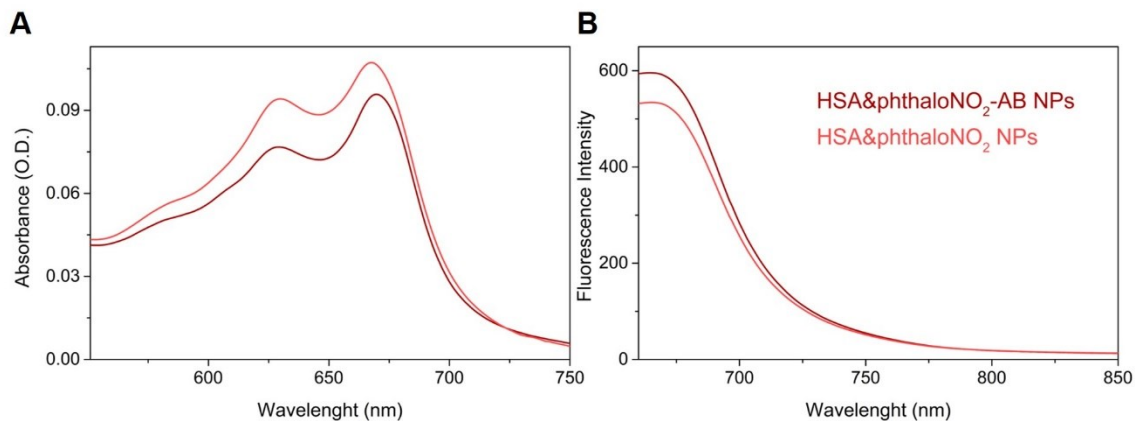

**Figure S9.** (A) Absorbance and (B) fluorescence emission spectra of HSA&phthaloNO<sub>2</sub>-AB NPs (deep orange) and HSA&phthaloNO<sub>2</sub> NPs (orange).

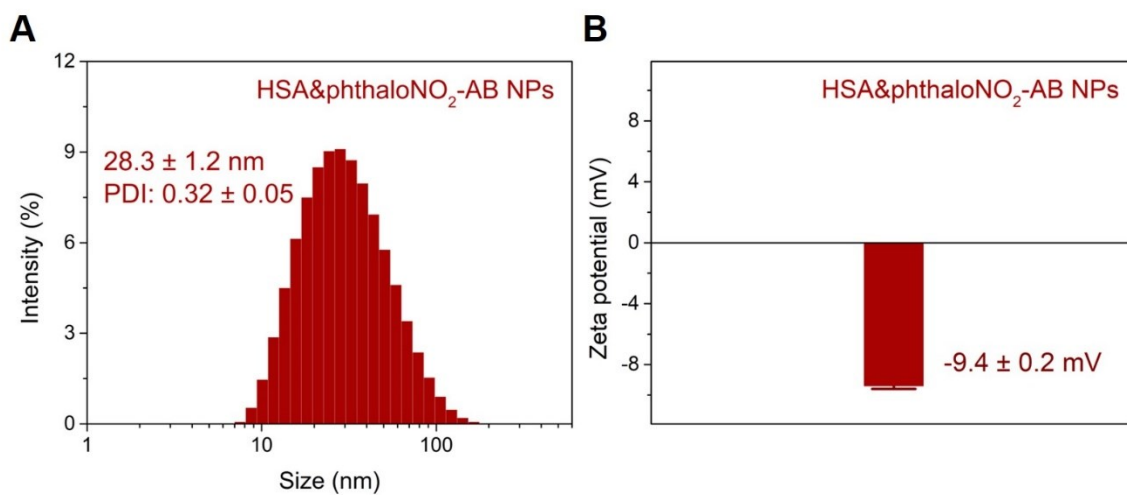

**Figure S10.** (A) DLS and (B) zeta-potential measurements of HSA&phthaloNO<sub>2</sub>-AB NPs.

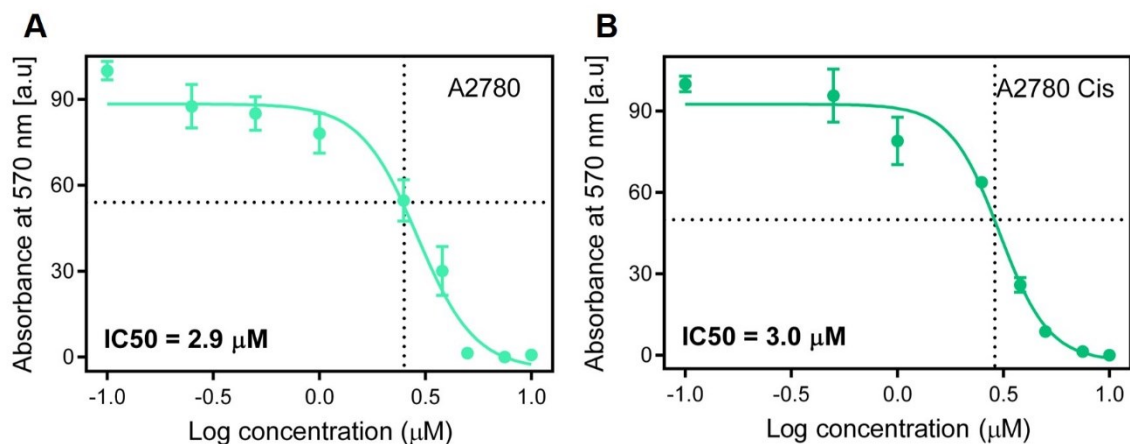

**Figure S11.** MTT assays performed on (A) A2780 and (B) control A2780 Cis cell lines for free phthaloNO<sub>2</sub> solutions.

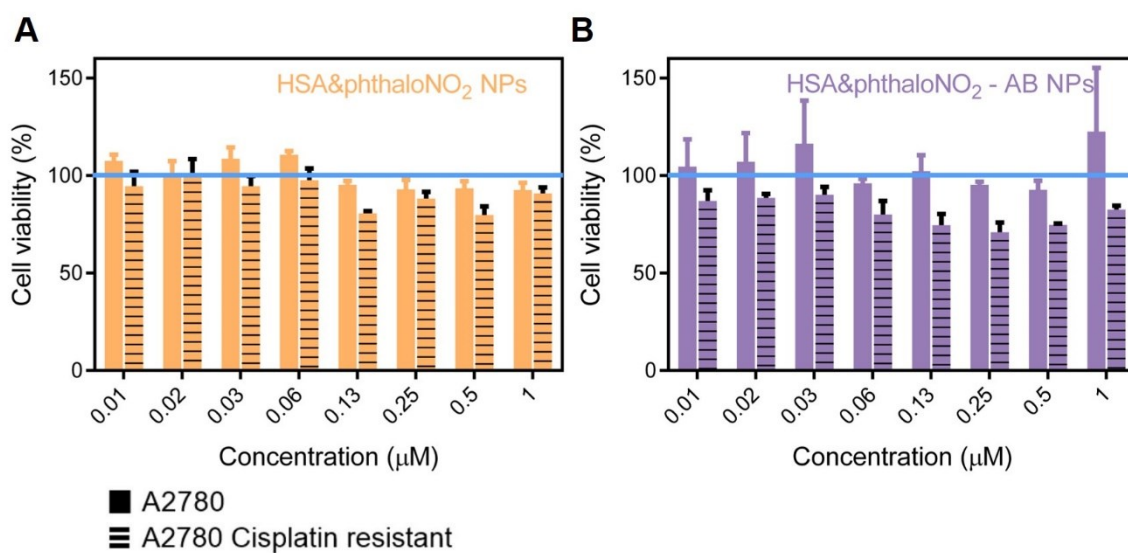

**Figure S12.** MTT assays performed on A2780 (solid colour) and A2780 Cis (lined colour) cell lines for (A) HSA&phthaloNO<sub>2</sub> NPs and (B) HSA&phthaloNO<sub>2</sub>-AB NPs; control group represented by the blue horizontal line (100% viability).

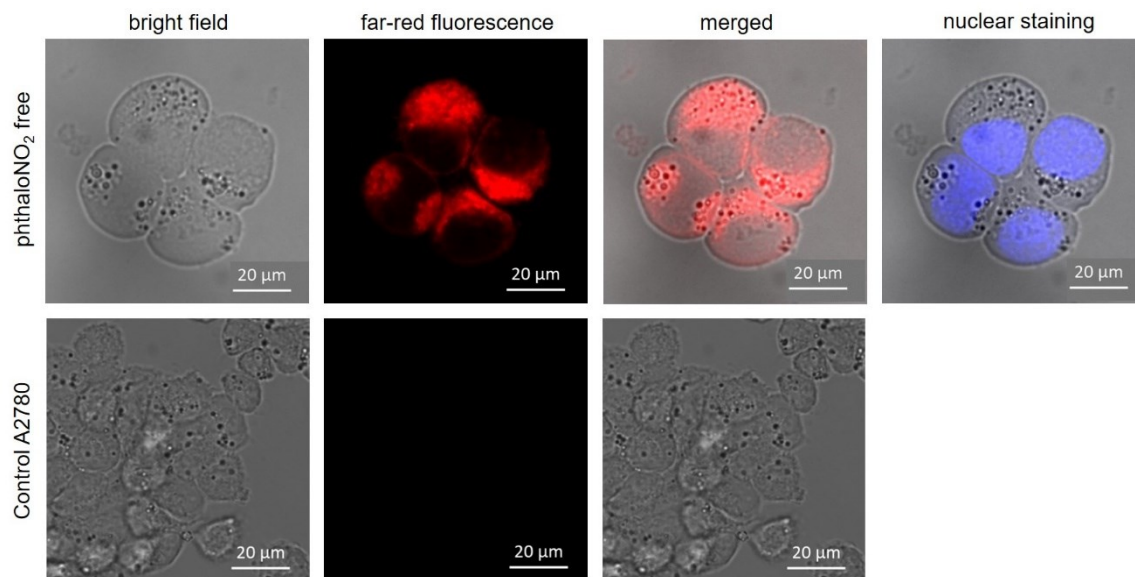

**Figure S13.** Fluorescence images of A2780 cells treated for 24h with phthaloNO<sub>2</sub> solution (top) and a control group without any treatment (bottom). The cells were stained with DAPI.

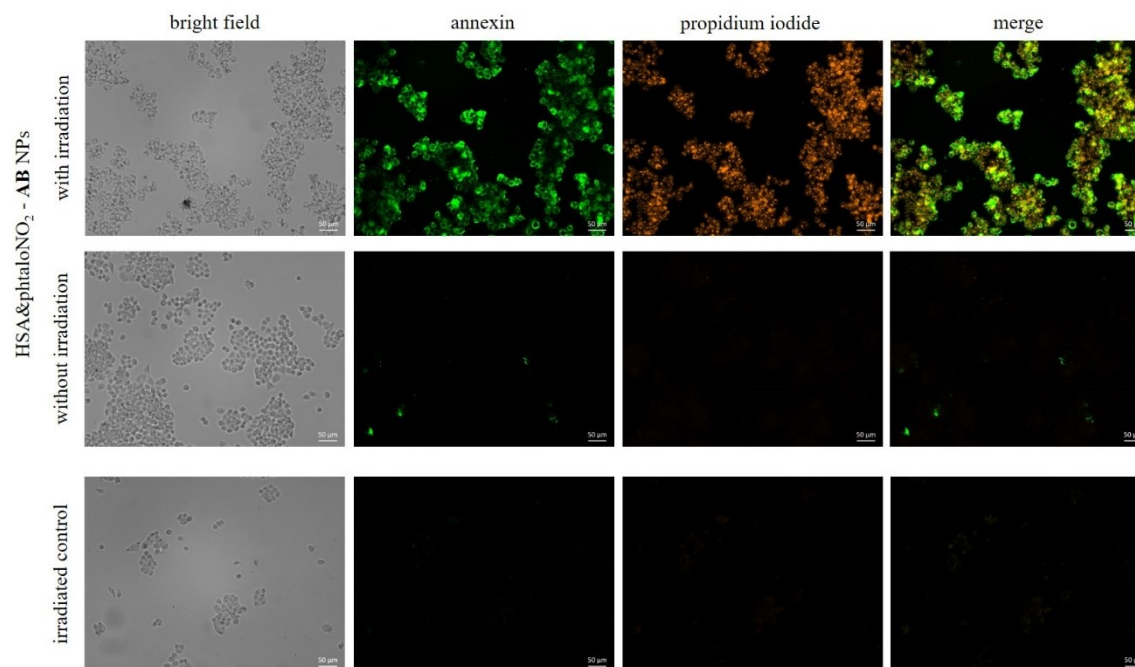

**Figure S14.** Multimodal therapy studied on A2780 cells treated with HSA&phthaloNO<sub>2</sub>-AB NPs and an irradiated control group (20x objective magnification). The cells were stained with Annexin V (green) and propidium iodide (orange).
